# Supplementary material
Source: PubMed Central journal article supplement (PMC3545650)
Supplement: NIHMS426718-supplement-1_si_001.pdf [file NIHMS426718-supplement-1_si_001.pdf]

# Supporting Information

## Application of $^1\text{H}$ DOSY for Facile Measurement of Polymer Molecular Weights.

Weibin Li<sup>1</sup>, Hongyong Chung<sup>1</sup>, Chris Daeffler<sup>1</sup>, Jeremiah A. Johnson<sup>2\*</sup>, Robert H. Grubbs<sup>1\*</sup>

<sup>1</sup>Division of Chemistry and Chemical Engineering, California Institute of Technology, Pasadena, California 91125, USA, <sup>2</sup>Department of Chemistry, Massachusetts Institute of Technology, Cambridge, Massachusetts 02139, USA.

\*Email: rhg@caltech.edu, jaj2109@mit.edu.

### Contents

|                           |   |
|---------------------------|---|
| General information ..... | 5 |
| ATRP experiments .....    | 5 |
| RAFT experiments .....    | 5 |
| ROMP experiments .....    | 6 |
| NMR experiments .....     | 7 |
| GPC characterization..... | 8 |

### Figures and Tables

|                                                                                                                        |    |
|------------------------------------------------------------------------------------------------------------------------|----|
| Figure S1. $^1\text{H}$ NMR spectrum of the ATRP reaction mixture at 5 min in benzene- $d_6$ at room temperature.....  | 9  |
| Figure S2. $^1\text{H}$ NMR spectrum of the ATRP reaction mixture at 20 min in benzene- $d_6$ at room temperature..... | 10 |
| Figure S3. $^1\text{H}$ NMR spectrum of the ATRP reaction mixture at 50 min in benzene- $d_6$ at room temperature..... | 10 |

|                                                                                                                          |    |
|--------------------------------------------------------------------------------------------------------------------------|----|
| Figure S4. $^1\text{H}$ NMR spectrum of the ATRP reaction mixture at 2 hours in benzene- $d_6$ at room temperature.....  | 11 |
| Figure S5. $^1\text{H}$ NMR spectrum of the ATRP reaction mixture at 4 hours in benzene- $d_6$ at room temperature.....  | 11 |
| Figure S6. $^1\text{H}$ NMR spectrum of the ATRP reaction mixture at 8 hours in benzene- $d_6$ at room temperature.....  | 12 |
| Figure S7. $^1\text{H}$ NMR spectrum of the ATRP reaction mixture at 20 hours in benzene- $d_6$ at room temperature..... | 12 |
| Figure S8. $^1\text{H}$ NMR spectrum of the ATRP reaction mixture at 45 hours in benzene- $d_6$ at room temperature..... | 13 |
| Figure S9. $^1\text{H}$ NMR spectrum of the RAFT reaction mixture at 9h50m in benzene- $d_6$ at room temperature.....    | 14 |
| Figure S10. $^1\text{H}$ NMR spectrum of the RAFT reaction mixture at 22h25m in benzene- $d_6$ at room temperature.....  | 14 |
| Figure S11. $^1\text{H}$ NMR spectrum of the RAFT reaction mixture at 29h20m in benzene- $d_6$ at room temperature.....  | 15 |
| Figure S12. $^1\text{H}$ NMR spectra of the COD ROMP mixture at 1 min in benzene- $d_6$ at room temperature.....         | 16 |
| Figure S13. $^1\text{H}$ NMR spectra of the COD ROMP mixture at 5 min in benzene- $d_6$ at room temperature.....         | 16 |
| Figure S14. $^1\text{H}$ NMR spectra of the COD ROMP mixture at 10 min in benzene- $d_6$ at room temperature.....        | 17 |
| Figure S15. $^1\text{H}$ NMR spectra of the COD ROMP mixture at 15 min in benzene- $d_6$ at room temperature.....        | 17 |
| Figure S16. $^1\text{H}$ NMR spectra of the COD ROMP mixture at 25 min in benzene- $d_6$ at room temperature.....        | 18 |
| Figure S17. $^1\text{H}$ NMR spectra of the COD ROMP mixture at 30 min in benzene- $d_6$ at room temperature.....        | 18 |
| Figure S18. $^1\text{H}$ NMR spectra of the COD ROMP mixture at 45 min in benzene- $d_6$ at room temperature.....        | 19 |

|                                                                                                                                                               |    |
|---------------------------------------------------------------------------------------------------------------------------------------------------------------|----|
| Figure S19. $^1\text{H}$ NMR spectra of the COD ROMP mixture at 60 min in benzene- $d_6$ at room temperature.....                                             | 19 |
| Figure S20. Representative $^1\text{H}$ DOSY of ATRP reaction crude after 45h in benzene- $d_6$ at rt.....                                                    | 20 |
| Figure S21. Representative $^1\text{H}$ DOSY of RAFT reaction crude after 29h20m in benzene- $d_6$ at rt. ....                                                | 20 |
| Figure S22. Representative $^1\text{H}$ DOSY of ROMP of COD reaction crude after 45m in benzene- $d_6$ at rt. ....                                            | 21 |
| Figure S23. Representative $^1\text{H}$ DOSY of ROMP of COE reaction crude after 45m in benzene- $d_6$ at rt. ....                                            | 21 |
| Figure S24. Mw-t plot of polymerization of styrene by ATRP. Black ball: results given by DOSY, red square: results given by GPC.....                          | 22 |
| Figure S25. Mw-t plot of polymerization of styrene by RAFT. Black ball: results given by DOSY, red square: results given by GPC.....                          | 22 |
| Figure S26. Enhanced PS calibration curve in benzene- $d_6$ for Mw prediction between 5000-30000 g/mol. ....                                                  | 23 |
| Figure S27. PS calibration curve in benzene- $d_6$ for Mw prediction. Black square: PS standards and benzene, red hollow square: polycyclooctene samples..... | 23 |
| Figure S28. GPC traces of polystyrene which synthesized by ATRP .....                                                                                         | 24 |
| Figure S29. GPC traces of polystyrene which synthesized by RAFT .....                                                                                         | 24 |
| Figure S30. Stejskal – Tanner Plot of diffusion results from ATRP. ....                                                                                       | 25 |
| Figure S31. Stejskal – Tanner Plot of diffusion results from RAFT. ....                                                                                       | 25 |
| Figure S32. Stejskal – Tanner Plot of diffusion results from ROMP.....                                                                                        | 26 |
| Table S1. D-Fw results of PS calibration curve and predictions.....                                                                                           | 26 |
| Table S2. ATRP results from GPC and externally referenced DOSY. ....                                                                                          | 27 |
| Table S3. RAFT results from GPC and externally referenced DOSY. ....                                                                                          | 28 |
| Table S4. D-Fw results of PS calibration curve and predictions with enhanced PS calibration for Mw prediction between 9000-30000 g/mol. ....                  | 29 |

|                                                                                                                               |    |
|-------------------------------------------------------------------------------------------------------------------------------|----|
| Table S5. D-Fw results of PS calibration curve for Mw prediction of polycyclooctene samples.<br>.....                         | 30 |
| Table S6. D-Fw results of PS calibration curve with incorporated polycyclooctene samples for<br>ROMP measurements .....       | 30 |
| Table S7. D-Fw results of 1,5-Cyclooctadiene ROMP reaction mixtures in DCM. ....                                              | 31 |
| Table S8. D-Fw results of cyclooctene ROMP reaction mixtures with 2 <sup>nd</sup> generation Grubbs<br>catalyst in DCM. ....  | 32 |
| Table S9. D-Fw results of cyclooctene ROMP reaction mixtures with 3 <sup>rd</sup> generation Grubbs<br>catalys in DCM. ....   | 32 |
| Table S10. D-Fw results of cyclooctene ROMP reaction mixtures with 2 <sup>nd</sup> generation Grubbs<br>catalyst in THF ..... | 33 |

## General information

Benzene- $d_6$  was kept with 4 Å molecular sieves under argon. 1, 5- cyclooctadiene, cyclooctene, Cu(I)Br (99.999%), N,N,N',N'',N''-pentamethyldiethylenetriamine (PMDETA), methyl 2-bromoisobutyrate, 2-(Dodecylthiocarbonothioylthio)-2-methylpropionic acid (DDMAT) azobisisobutyronitrile (AIBN) and styrene were obtained from Aldrich Chemical Co., and used as received. Polystyrene commercial standards were purchased from Polysciences Inc. (9000 g/mol, 60000 g/mol, and 80000 g/mol), Pressure Chemical Co. (30000 g/mol and 200000 g/mol), and Shodex Denko America (156000 g/mol).

## ATRP experiments

In a Schlenk flask, CuBr (50 mg), PMDETA (60.4 mg) and methyl 2-bromoisobutyrate (63 mg) were placed. The solid reagents containing Schlenk flask was repeatedly vacuumed and backfilled with dry argon for three times. Degassed styrene (7.3 g) and Anisole (8 ml) were added to the solid reagent containing Schlenk flask. The first aliquot was taken prior to placing the reaction mixture in 90 °C oil bath. Kinetic aliquots (0.3 ml) were taken at designated times for DOSY and GPC characterization. For each aliquot, the polymerization was stopped by removing heat followed by exposure the reaction solution in the air. The polymer solution was filtered through neutral alumina packed column to remove copper complex.

## RAFT experiments

All solid reagents, DDMAT (100 mg), AIBN (9 mg) were placed in Schlenk flask and the Schlenk flask was repeatedly vacuumed and backfilled with dry argon for three

times. Degassed styrene (5.7 g) and anisole (6.3 ml) were added to the Schlenk flask and then the reaction mixture was degassed by argon bubbling. The reaction mixture was heated at 70 °C with stirring. Aliquots (0.3 ml) were taken at designated times for DOSY and GPC characterization.

## **ROMP experiments**

**The kinetic experiments of COD ROMP.** In a flame-dried and argon-charged 50 mL flask was added 1.696 mg (0.002 mmol) The 2<sup>nd</sup> generation “Sheng Ding” catalyst **8** and 20 mL dry dichloromethane at room temperature. Timing was started as soon as 1.230 mL (10 mmol) 1, 5- cyclooctadiene was injected into the solution. 1 mL aliquots were extracted via syringe from the reaction mixture at designated times into a scintillation vial with two drops of ethyl vinyl ether. 40 µL of the quenched reaction mixture were transferred to an NMR tube and diluted with 1 mL of benzene-*d*<sub>6</sub> for NMR experiments.

**The kinetic experiments of COE ROMP.** In a flame-dried and argon-charged 50 mL flask was added 1.696 mg (0.002 mmol) the 2<sup>nd</sup> generation “Sheng Ding” catalyst **8** or 1.450 mg (0.002 mmol) the 3<sup>rd</sup> generation “bispyridine” catalyst **9** and 20 mL dry dichloromethane at room temperature. Timing was started as soon as 1.303 mL (10 mmol) cyclooctene was injected into the solution. 1 mL aliquots were extracted via syringe from the reaction mixture at designated times into a scintillation vial with two drops of ethyl vinyl ether. 40 µL of the quenched reaction mixture were transferred to an NMR tube and diluted with 1 mL of benzene-*d*<sub>6</sub> for NMR experiments.

**Synthesis of polyCOE samples by ROMP.** In a nitrogen-filled glovebox, a scintillation vial with a PTFE-coated stirbar was charged with *cis*-cyclooctene (COE, 2.6 ml, 20 mmol), *trans*-stilbene (chain-transfer agent, given below) and THF (10 ml).

A solution of the initiator (17 mg, 0.02 mmol, [COE]/[initiator]=1000) in THF (1 ml) was added to the monomer solution in one portion. The scintillation vial was sealed with a PTFE-line cap, removed from the glovebox and heated at 40 °C for 2 hours. At the end of the polymerization, the solution was cooled to room temperature and the initiator was quenched with ethyl vinyl ether (1 ml) for 15 minutes. The viscous polymer solution was precipitated into MeOH (200 ml). The PCOE isolated by filtration followed by removal the residual solvent *in vacuo* to give a white powder.

### **NMR experiments**

All NMR tubes were flame dried and evacuated *in vacuo* in advance. NMR experiments were performed at 25 °C. All NMR samples were stabilized at 25 °C for 5 min before data collection. For polystyrene standard samples, each NMR tube contained 0.5 mg polystyrene and 1 mL benzene-*d*<sub>6</sub>. For ATRP, RAFT, and ROMP samples, each NMR tube contained 40 µL reaction mixture and 1 mL benzene-*d*<sub>6</sub>. DOSY experiments were performed on a Bruker DRX 300 spectrometer equipped with an Accustar *z*-axis gradient amplifier and an ATMA BBO probe with a *z*-axis gradient coil. All experiments were run without spinning to avoid convection. Maximum gradient strength was 0.214 T/m. The standard Bruker pulse program, *step1s*, employing a stimulated echo sequence and 1 spoil gradient was utilized. Bipolar rectangular gradients were used with a total duration of 0.5-10 ms (7 ms for polystyrene measurement). Gradient recovery delays were 0.5-1 µs. Diffusion times were between 100-2000 ms (200 ms for polystyrene measurement). The number of gradient steps was set to be 32. Individual rows of the quasi-2-D diffusion databases were phased and baseline corrected. DOSY spectra were processed by Topspin 1.3 software. Diffusion dimension was generated using inverse Laplace Transform driven by maximum entropy method.<sup>1</sup> Diffusion coefficients of a chosen narrow chemical shift range were extracted from T1/T2 analysis module of Topspin 1.3 calculated

from the maximum entropy (GIFA) module developed by Delsuc *et al.*<sup>2</sup> Unless otherwise mentioned, the DOSY spectrum was processed without additional processing parameter modifications.

### **GPC characterization**

GPC analysis of polymer was performed by two PLgel 10  $\mu\text{m}$  mixed-B LS columns (Polymer Laboratories) connected in series with a DAWN EOS multiangle laser light scattering (MALLS) detector (Wyatt Technology), an Optilab DSP differential refractometer (Wyatt Technology), and a ViscoStar viscometer (Wyatt Technology) in THF eluent. The analysis was performed with a flow rate of 1 ml/min at room temperature. Absolute molecular weights and PDI were calculated from  $dn/dc$  values that were obtained by assuming 100% mass elution from the GPC columns.



# <sup>1</sup>H NMR spectra of ATRP reaction mixtures for integration

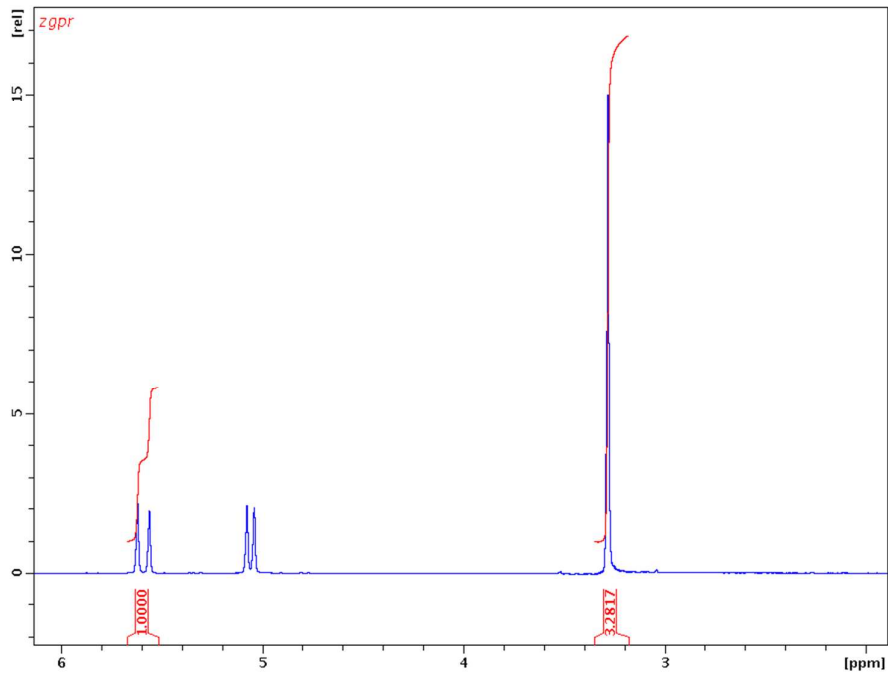

Figure S1. <sup>1</sup>H NMR spectrum of the ATRP reaction mixture at 0 min in benzene-*d*<sub>6</sub> at room temperature.

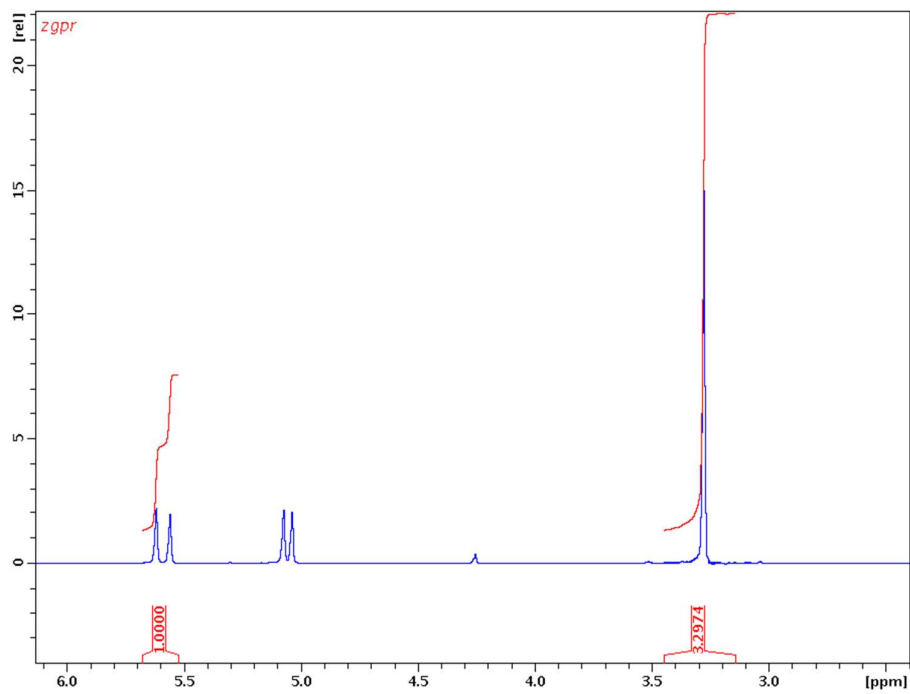

Figure S1. <sup>1</sup>H NMR spectrum of the ATRP reaction mixture at 5 min in benzene-*d*<sub>6</sub> at room temperature.

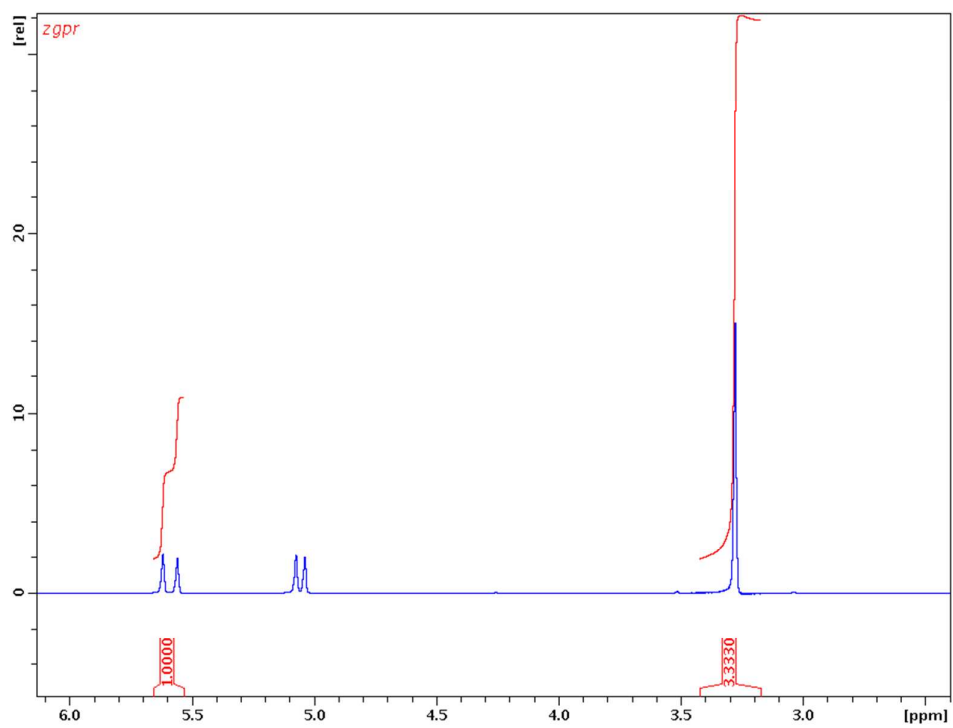

Figure S2. <sup>1</sup>H NMR spectrum of the ATRP reaction mixture at 20 min in benzene-*d*<sub>6</sub> at room temperature.

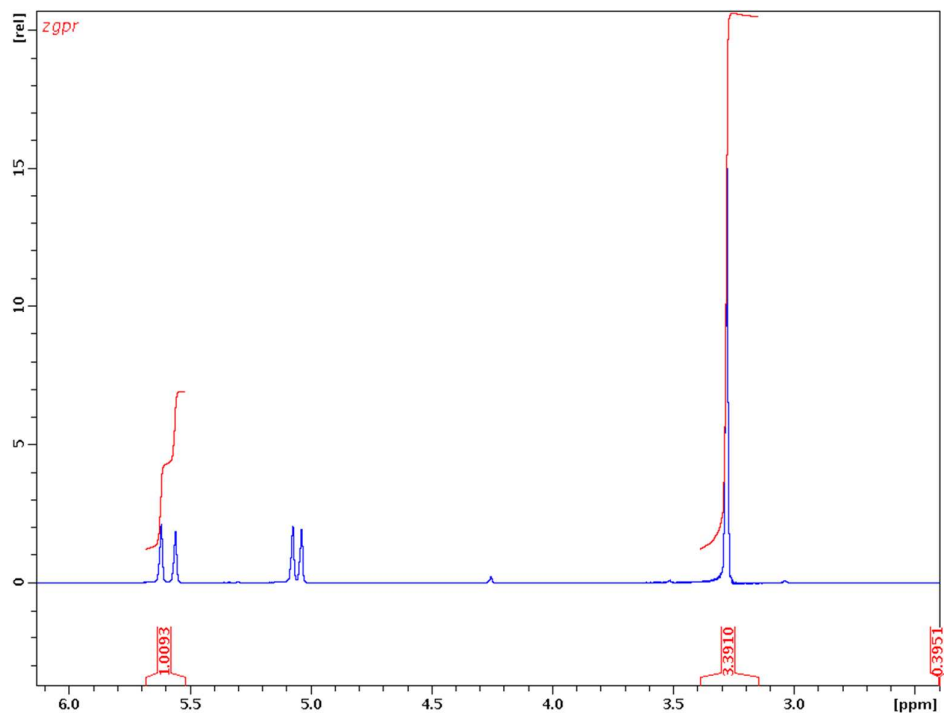

Figure S3. <sup>1</sup>H NMR spectrum of the ATRP reaction mixture at 50 min in benzene-*d*<sub>6</sub> at room temperature.

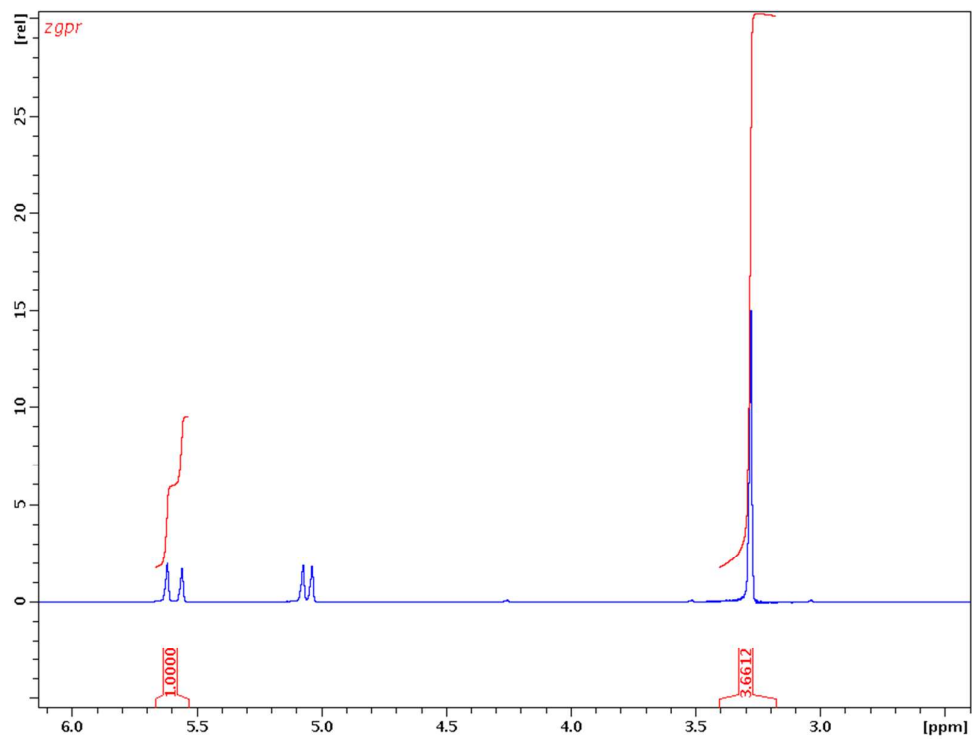

Figure S4. <sup>1</sup>H NMR spectrum of the ATRP reaction mixture at 2 hours in benzene-*d*<sub>6</sub> at room temperature.

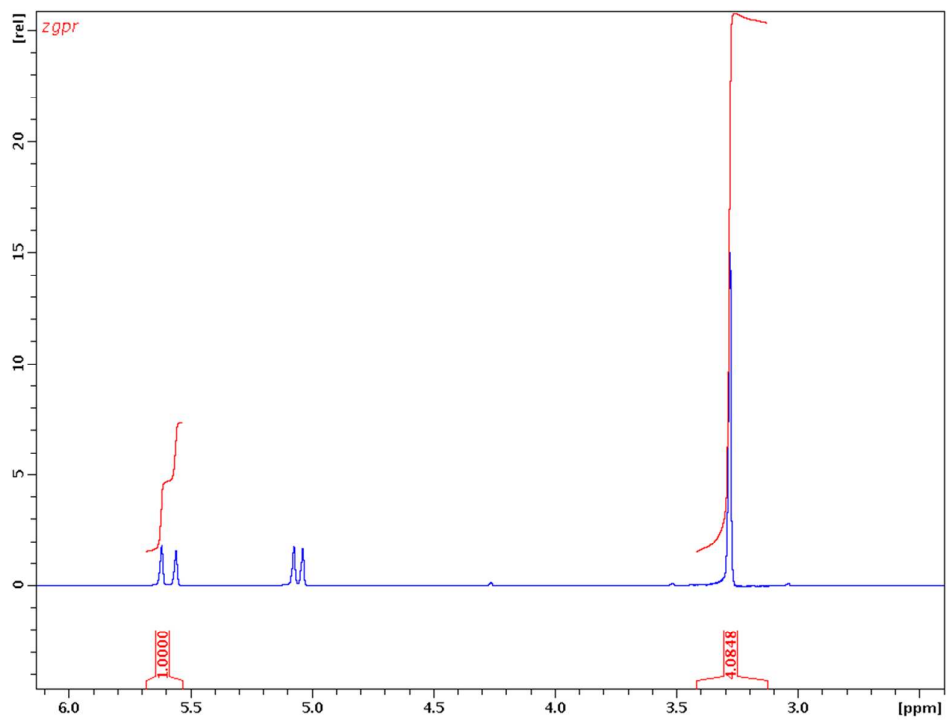

Figure S5. <sup>1</sup>H NMR spectrum of the ATRP reaction mixture at 4 hours in benzene-*d*<sub>6</sub> at room temperature.

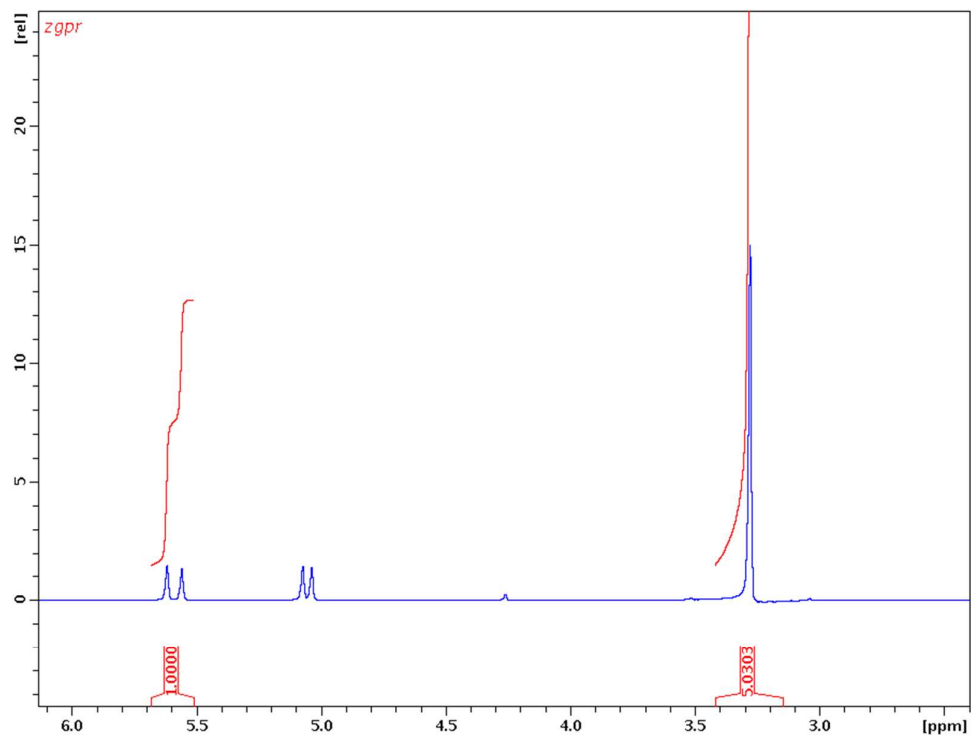

Figure S6. <sup>1</sup>H NMR spectrum of the ATRP reaction mixture at 8 hours in benzene-*d*<sub>6</sub> at room temperature.

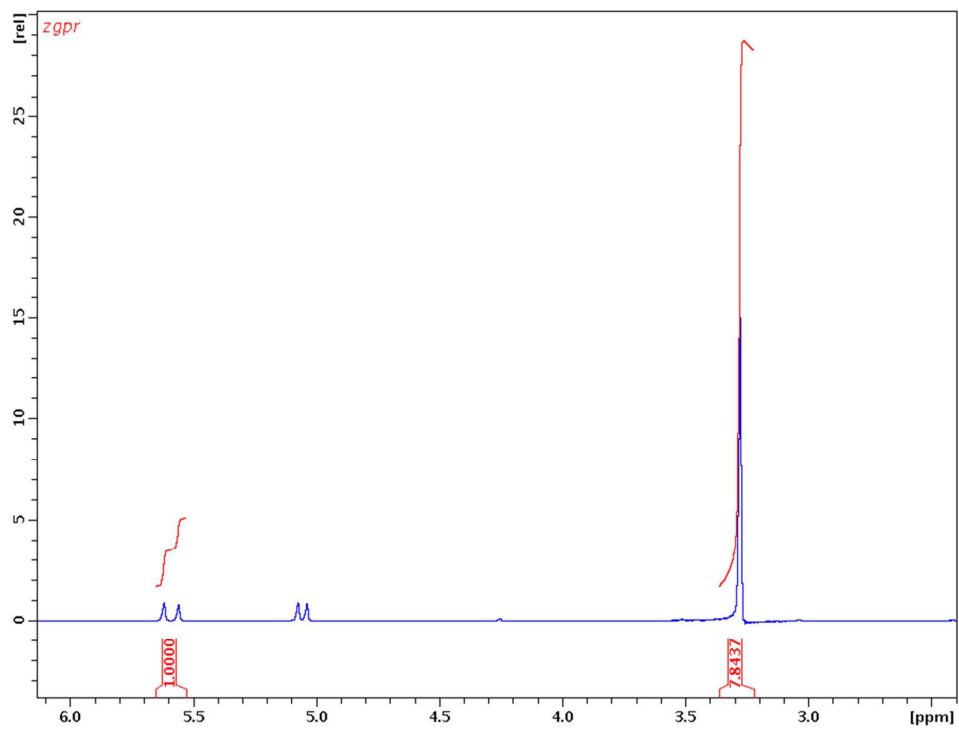

Figure S7. <sup>1</sup>H NMR spectrum of the ATRP reaction mixture at 20 hours in benzene-*d*<sub>6</sub> at room temperature.

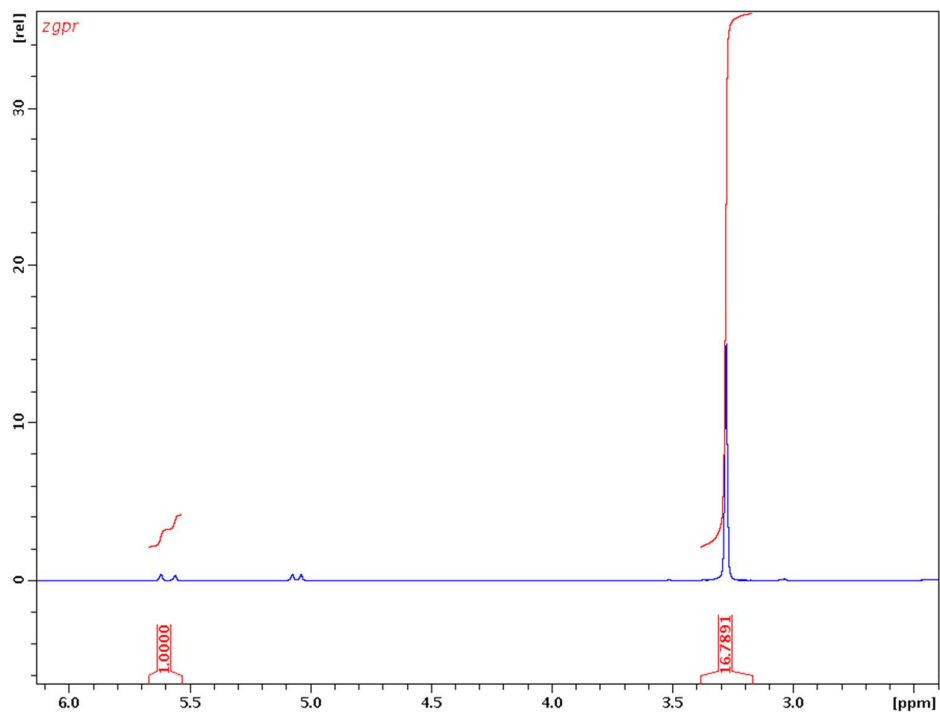

Figure S8.  $^1\text{H}$  NMR spectrum of the ATRP reaction mixture at 45 hours in benzene- $d_6$  at room temperature.

### <sup>1</sup>H NMR spectra of RAFT reaction mixtures for integration

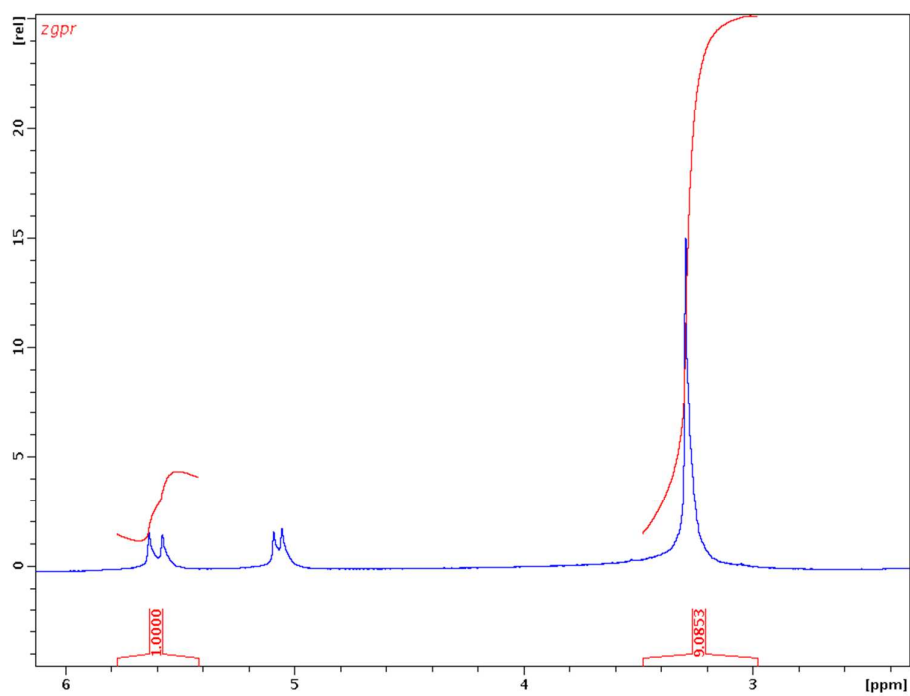

Figure S9. <sup>1</sup>H NMR spectrum of the RAFT reaction mixture at 9h50m in benzene-*d*<sub>6</sub> at room temperature.

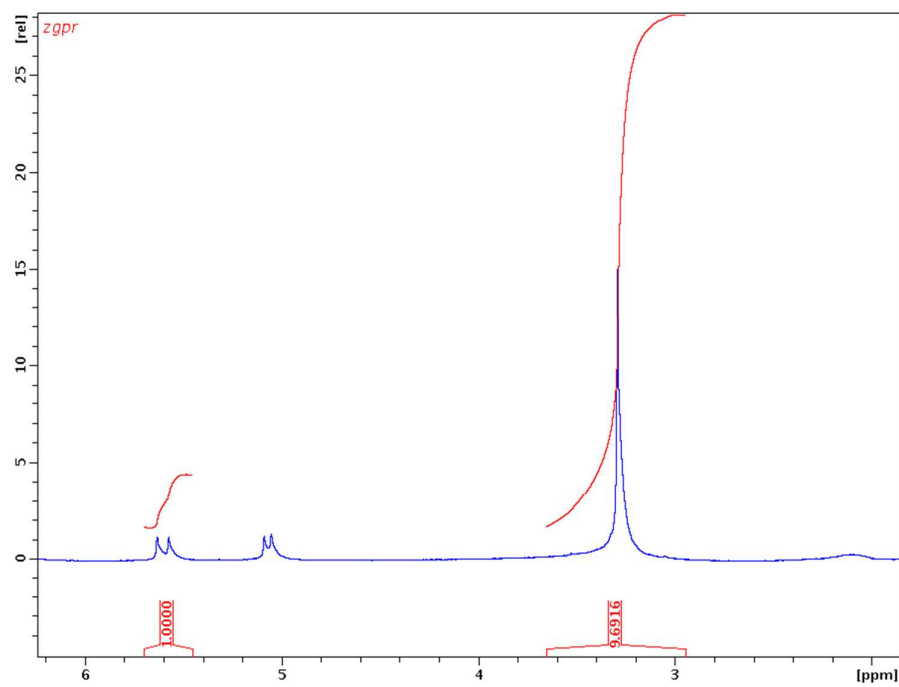

Figure S10. <sup>1</sup>H NMR spectrum of the RAFT reaction mixture at 22h25m in benzene-*d*<sub>6</sub> at room temperature.

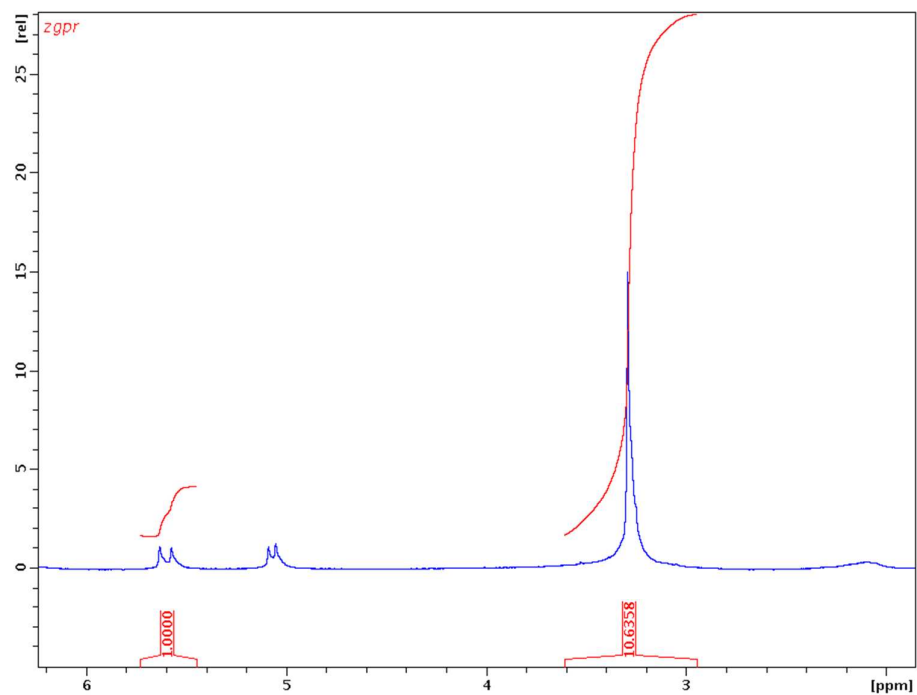

Figure S11.  $^1\text{H}$  NMR spectrum of the RAFT reaction mixture at 29h20m in benzene- $d_6$  at room temperature.

### $^1\text{H}$ NMR spectra of ROMP of COD reaction mixtures for integration

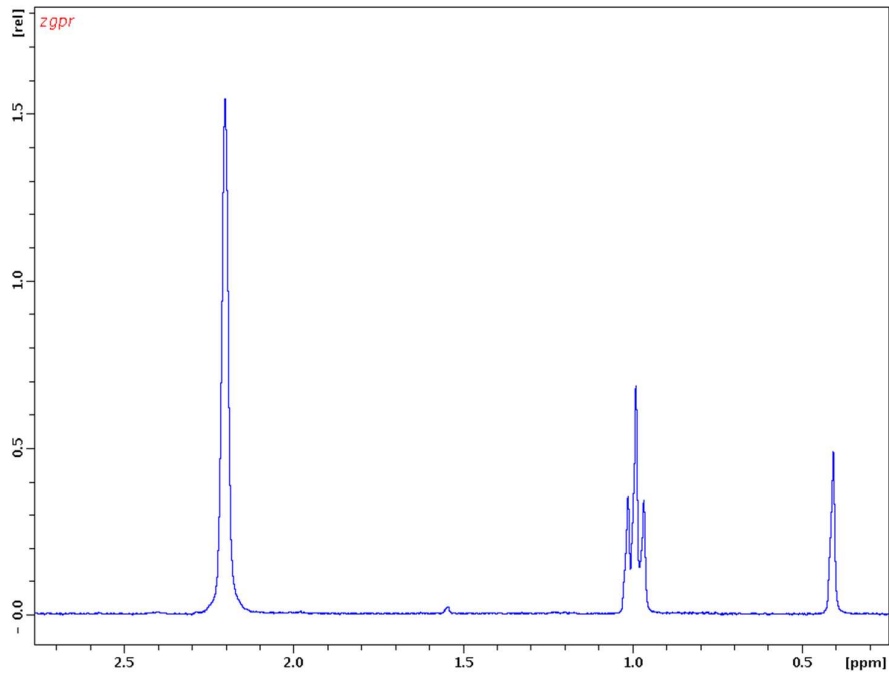

Figure S12.  $^1\text{H}$  NMR spectra of the COD ROMP mixture at 1 min in benzene- $d_6$  at room temperature.

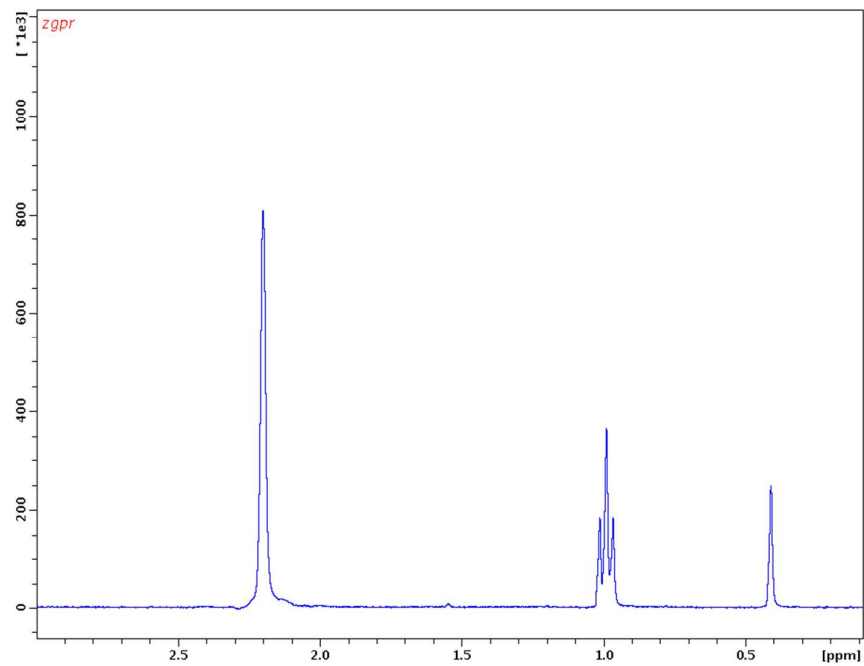

Figure S13.  $^1\text{H}$  NMR spectra of the COD ROMP mixture at 5 min in benzene- $d_6$  at room temperature.



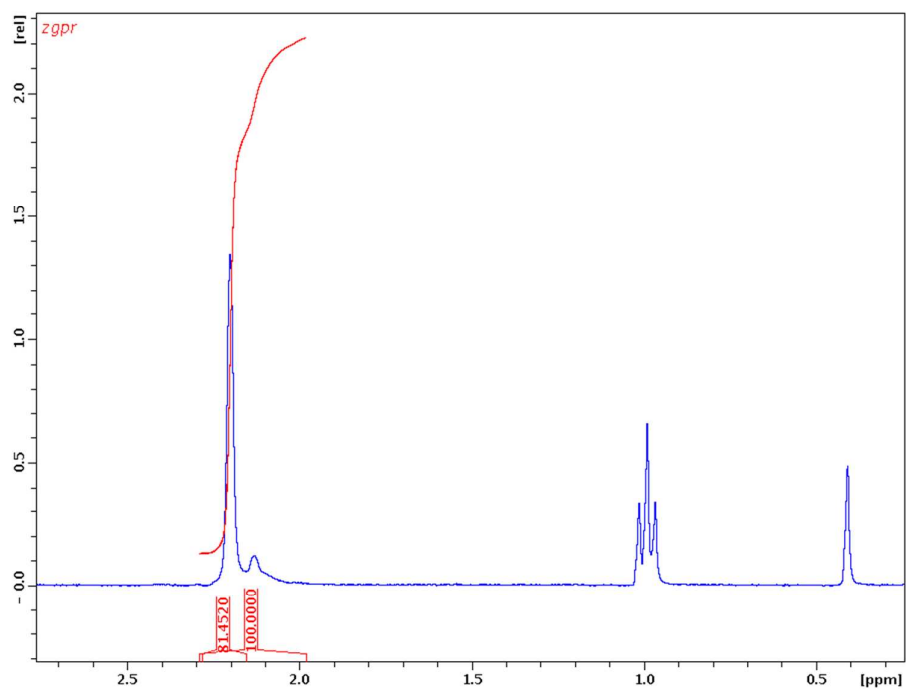

Figure S14. <sup>1</sup>H NMR spectra of the COD ROMP mixture at 10 min in benzene-*d*<sub>6</sub> at room temperature.

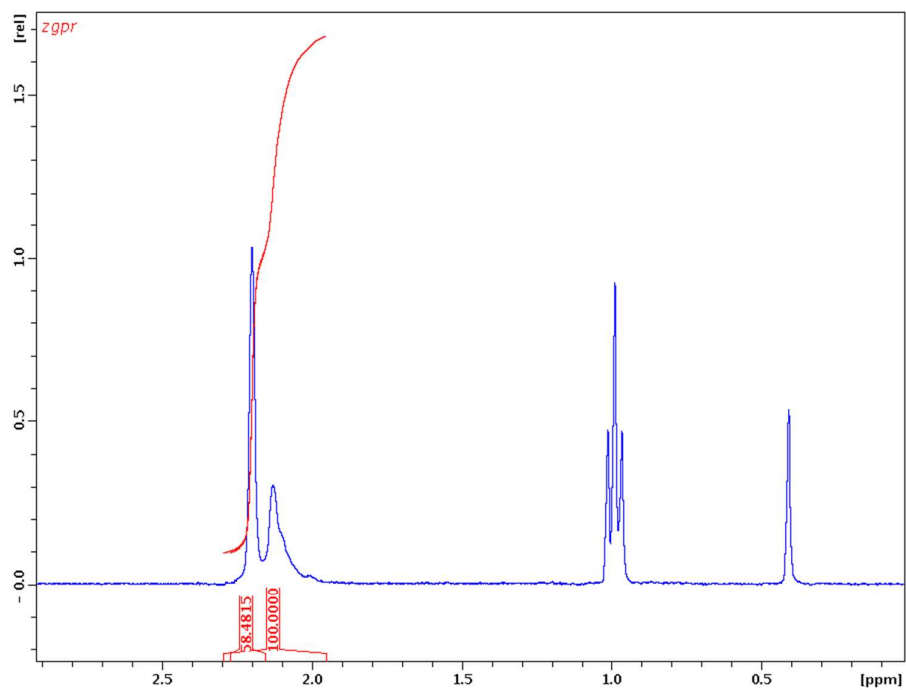

Figure S15. <sup>1</sup>H NMR spectra of the COD ROMP mixture at 15 min in benzene-*d*<sub>6</sub> at room temperature.

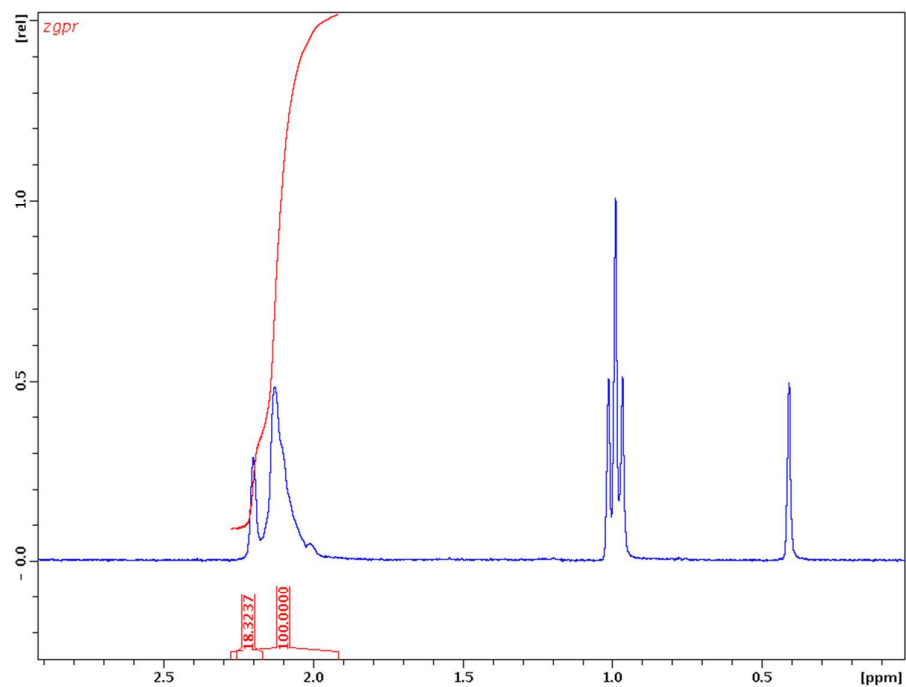

Figure S16. <sup>1</sup>H NMR spectra of the COD ROMP mixture at 25 min in benzene-*d*<sub>6</sub> at room temperature.

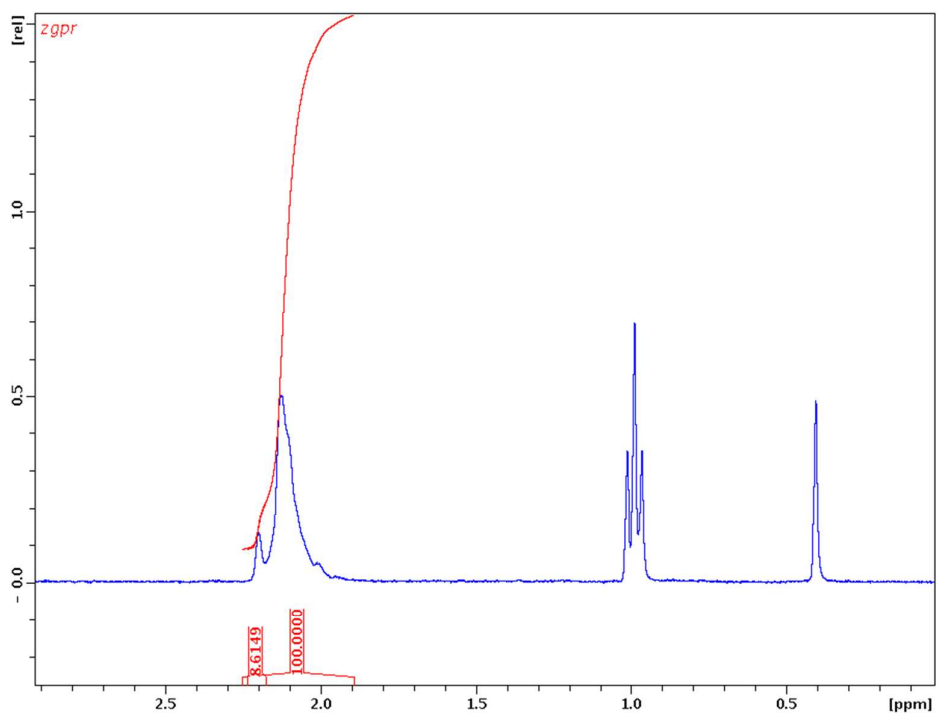

Figure S17. <sup>1</sup>H NMR spectra of the COD ROMP mixture at 30 min in benzene-*d*<sub>6</sub> at room temperature.

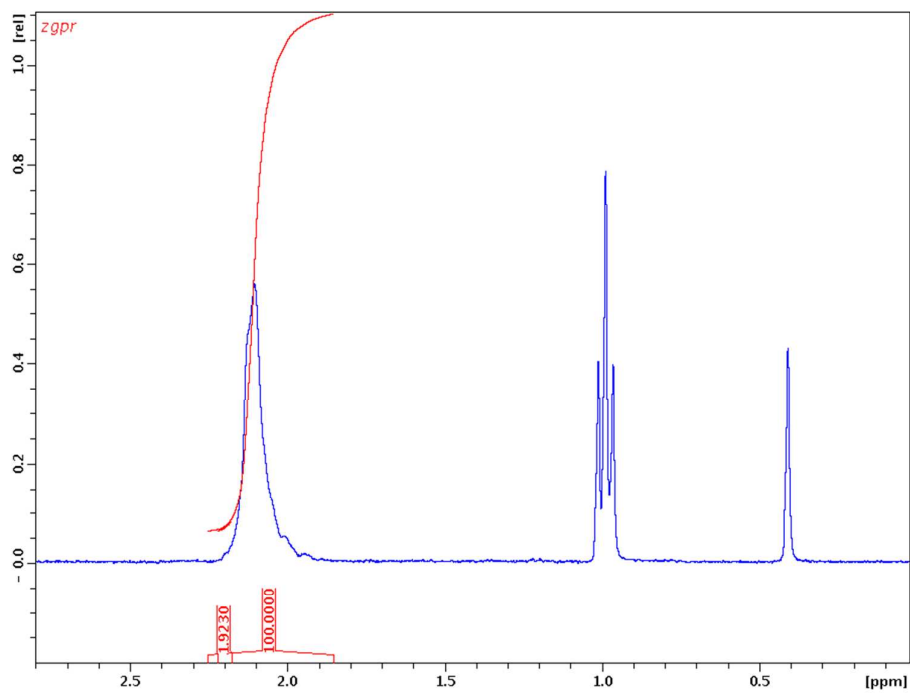

Figure S18. <sup>1</sup>H NMR spectra of the COD ROMP mixture at 45 min in benzene-*d*<sub>6</sub> at room temperature.

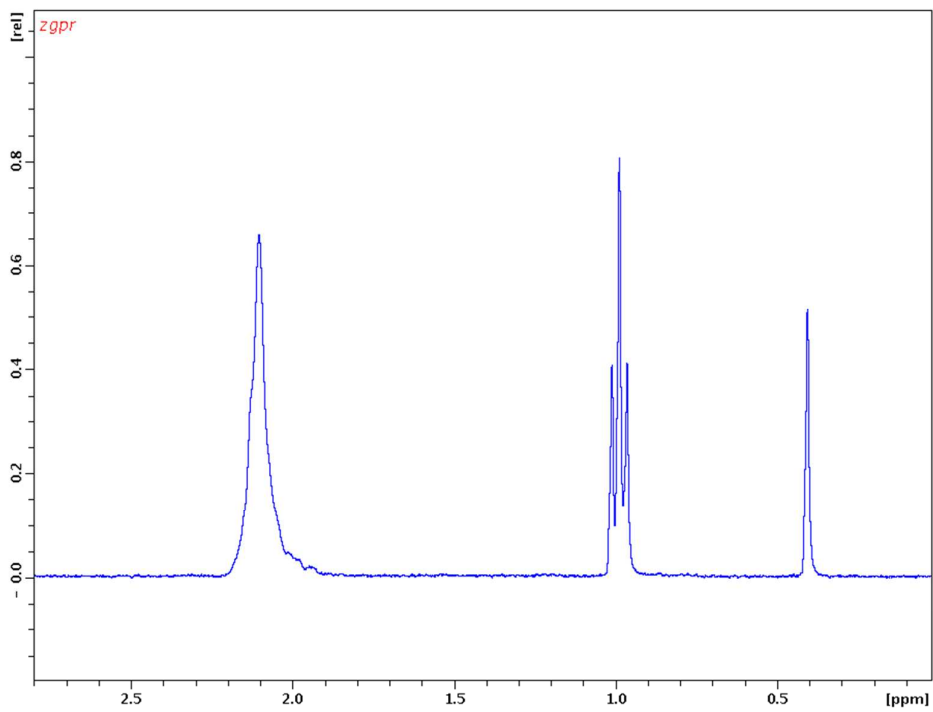

Figure S19. <sup>1</sup>H NMR spectra of the COD ROMP mixture at 60 min in benzene-*d*<sub>6</sub> at room temperature.

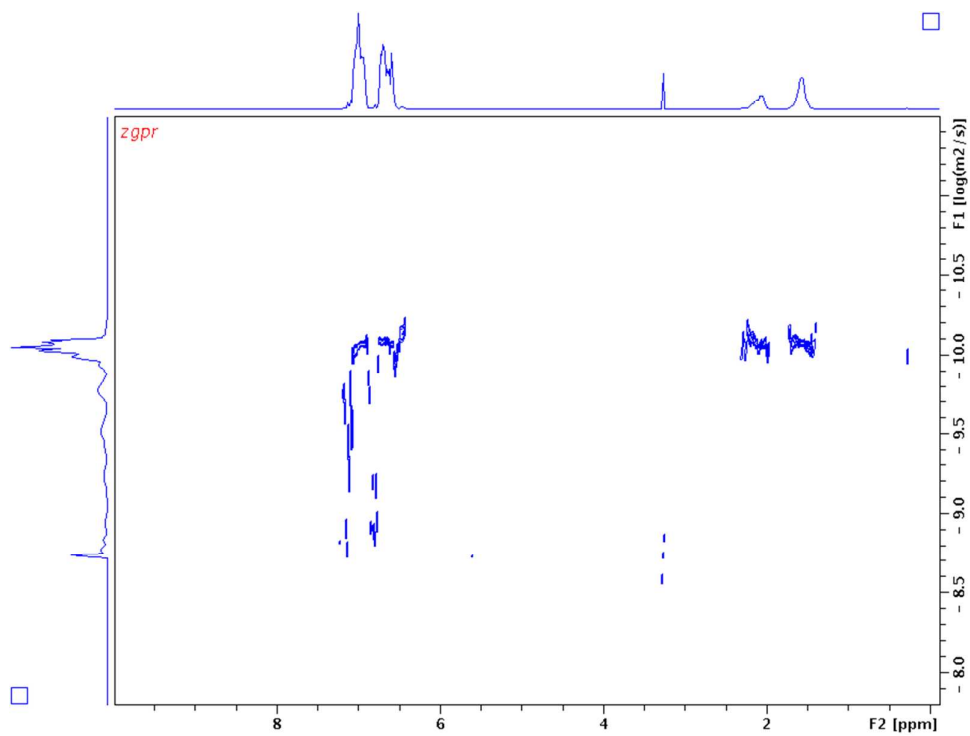

Figure S20. Representative <sup>1</sup>H DOSY of ATRP reaction crude after 45h in benzene-d<sub>6</sub> at rt.

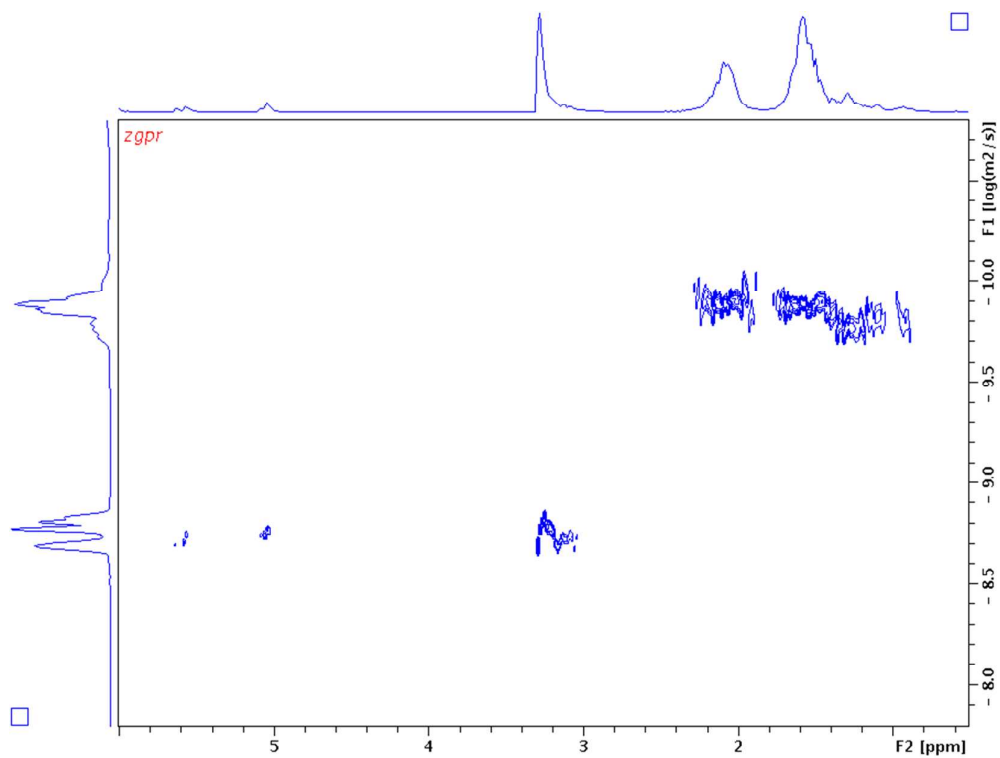

Figure S21. Representative <sup>1</sup>H DOSY of RAFT reaction crude after 29h20m in benzene-d<sub>6</sub> at rt.

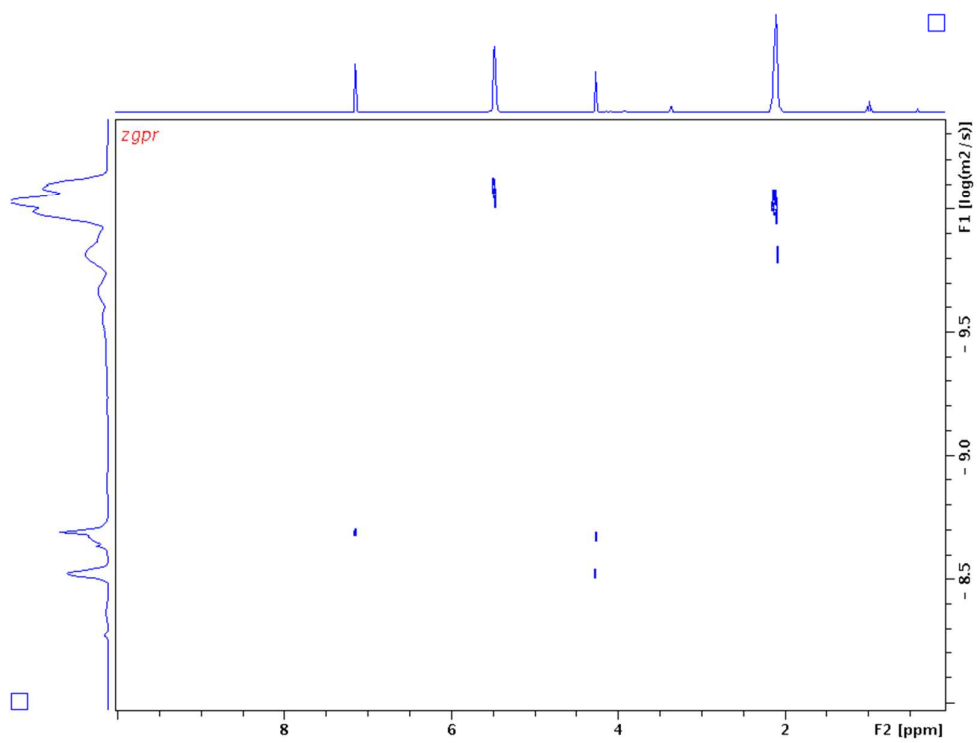

Figure S22. Representative <sup>1</sup>H DOSY of ROMP of COD reaction crude after 45m in benzene-d<sub>6</sub> at rt.

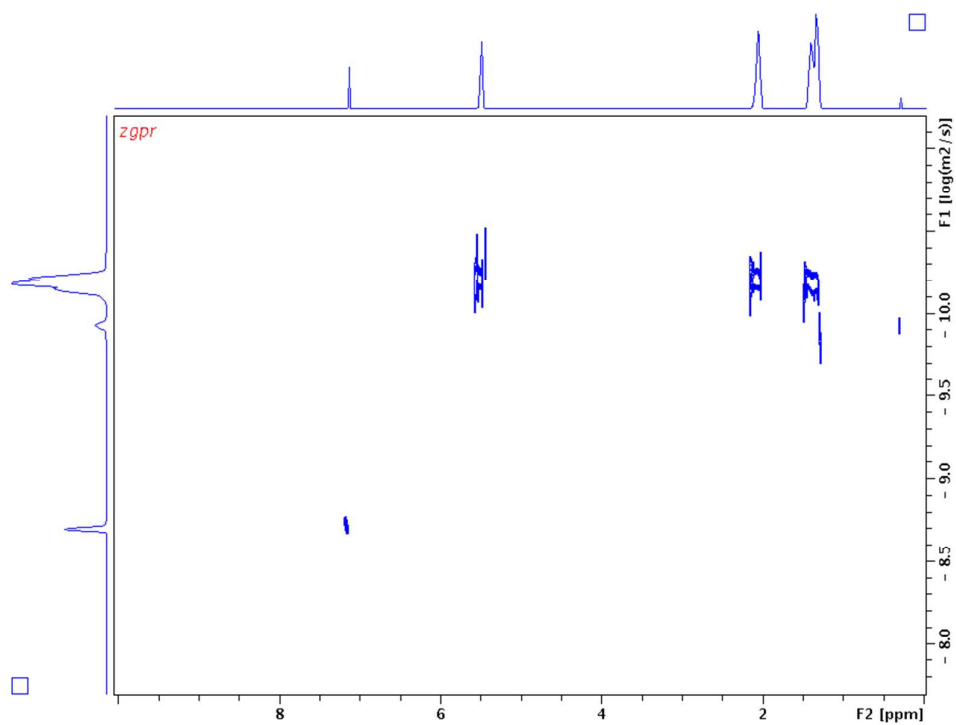

Figure S23. Representative <sup>1</sup>H DOSY of ROMP of COE reaction crude after 45m in benzene-d<sub>6</sub> at rt.

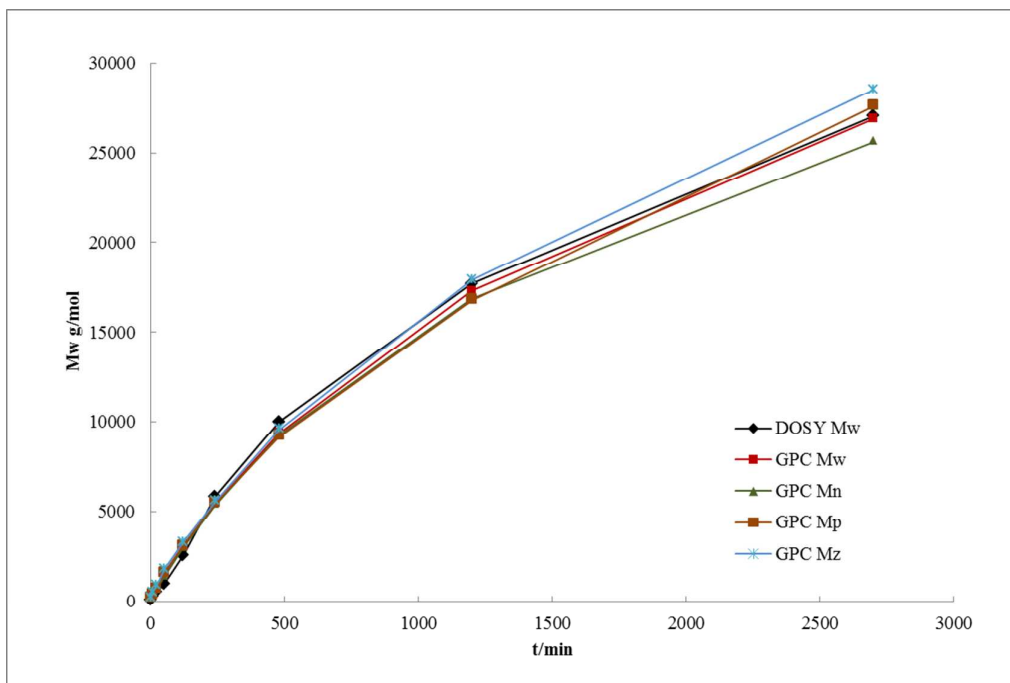

Figure S24. Mw-t plot of polymerization of styrene by ATRP. Black ball: results given by DOSY, red square: results given by GPC.

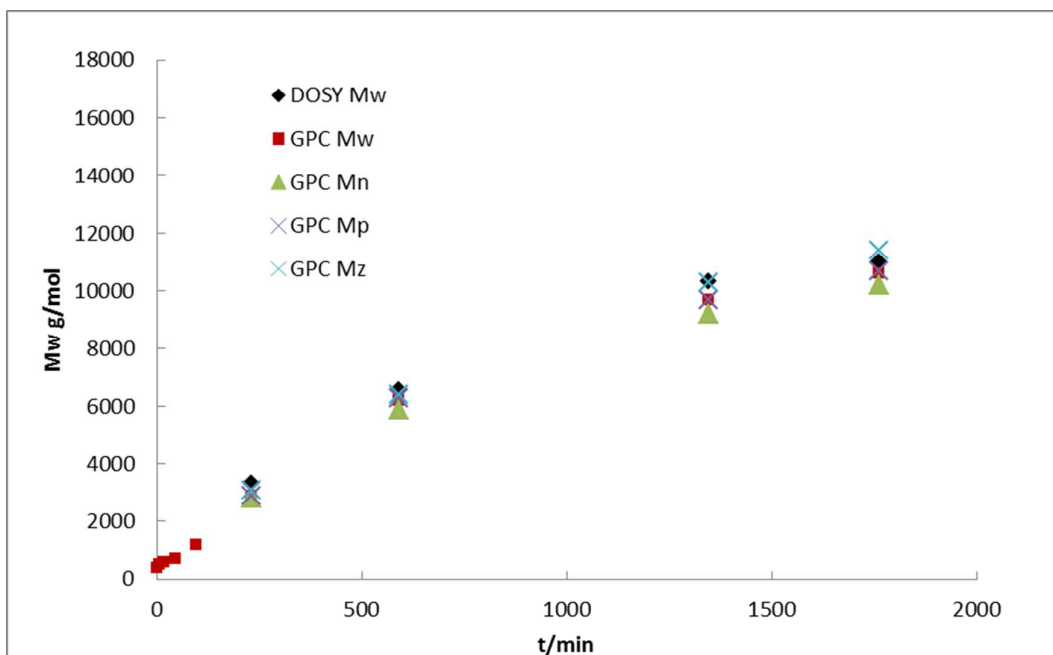

Figure S25. Mw-t plot of polymerization of styrene by RAFT. Black ball: results given by DOSY, red square: results given by GPC.

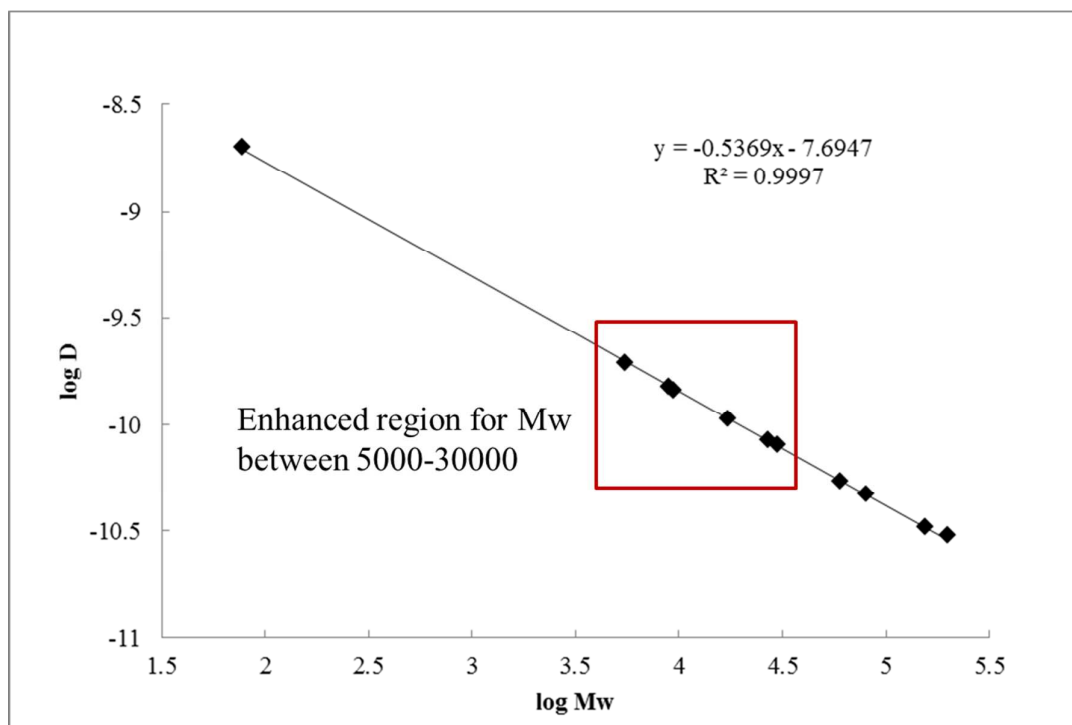

Figure S26. Enhanced PS calibration curve in benzene- $d_6$  for  $M_w$  prediction between 5000-30000 g/mol.

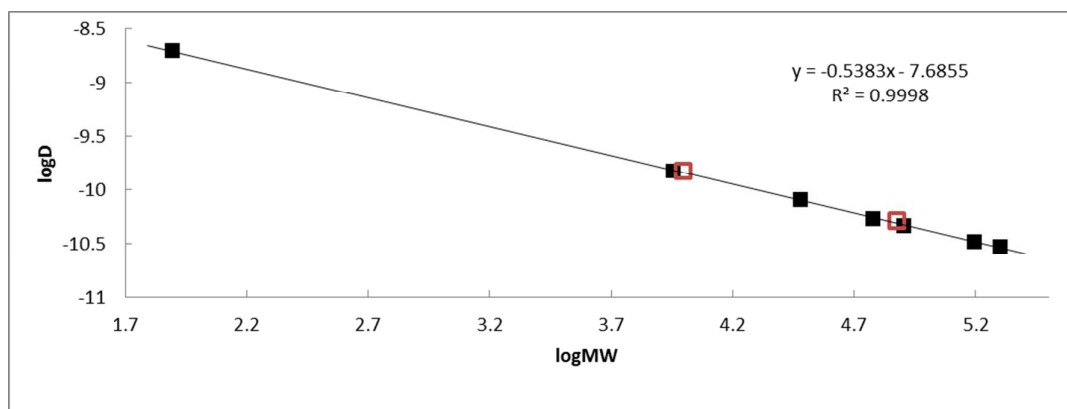

Figure S27. PS calibration curve in benzene- $d_6$  for  $M_w$  prediction. Black square: PS standards and benzene, red hollow square: polycyclooctene samples.

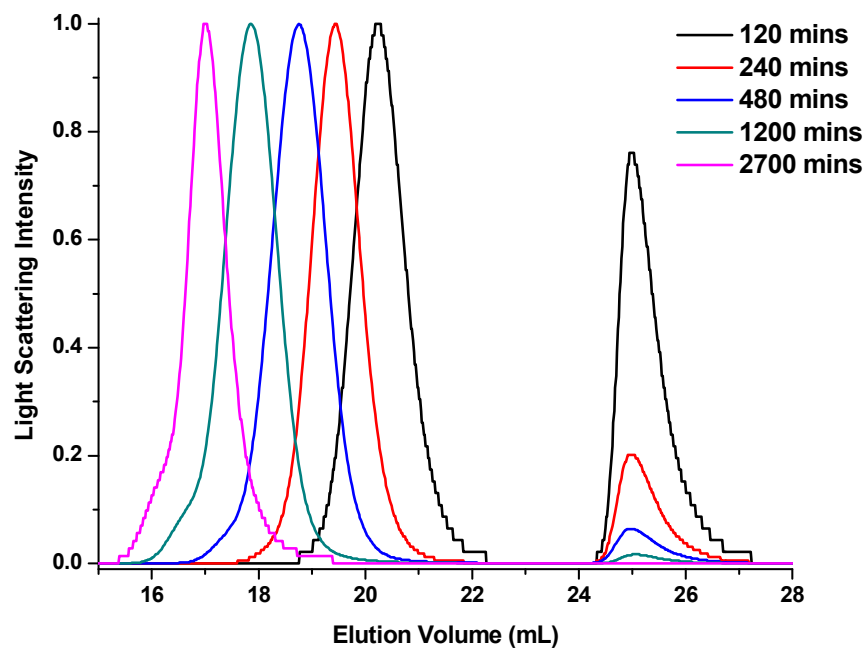

Figure S28. GPC traces of polystyrene which synthesized by ATRP

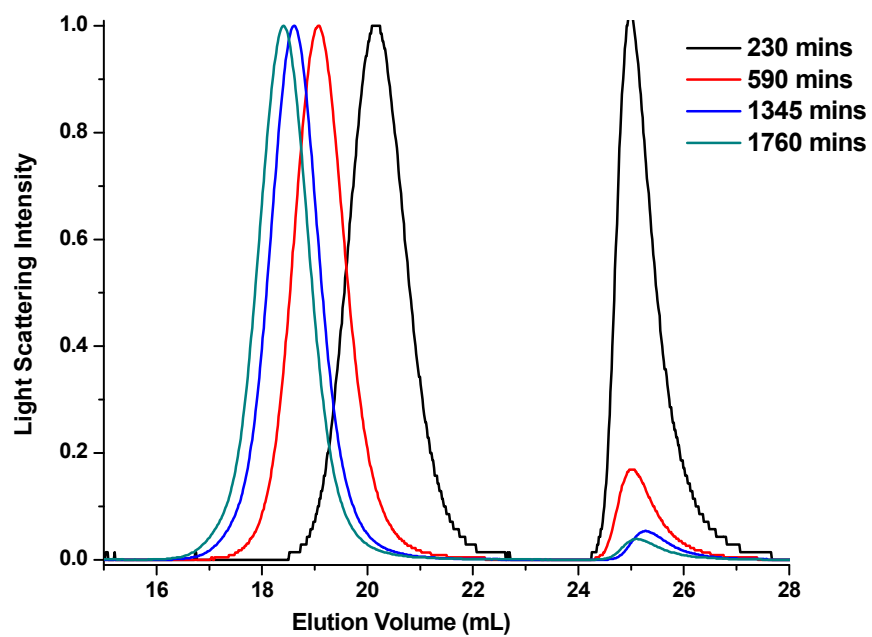

Figure S29. GPC traces of polystyrene which synthesized by RAFT



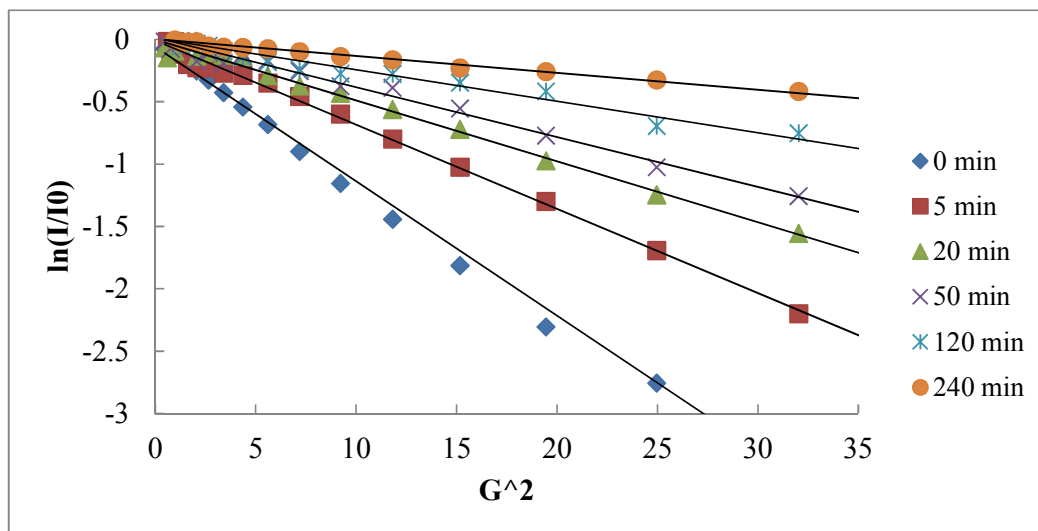

Figure S30. Stejskal – Tanner Plot of diffusion results from ATRP.

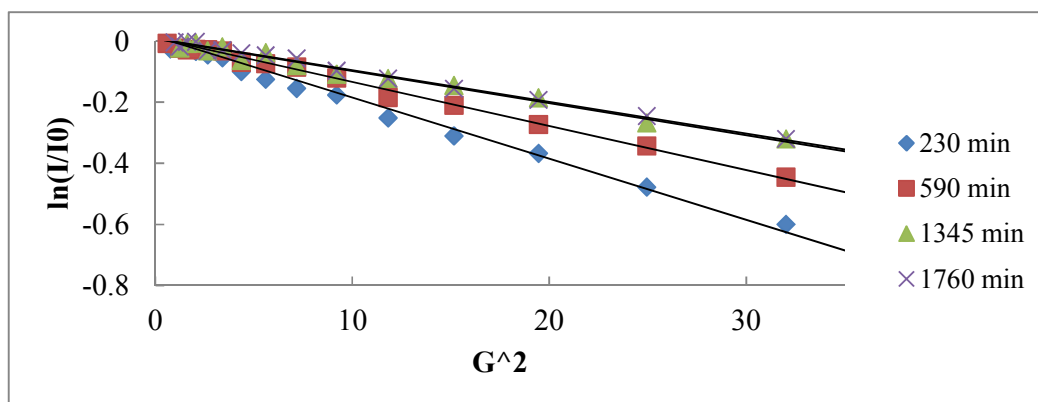

Figure S31. Stejskal – Tanner Plot of diffusion results from RAFT.

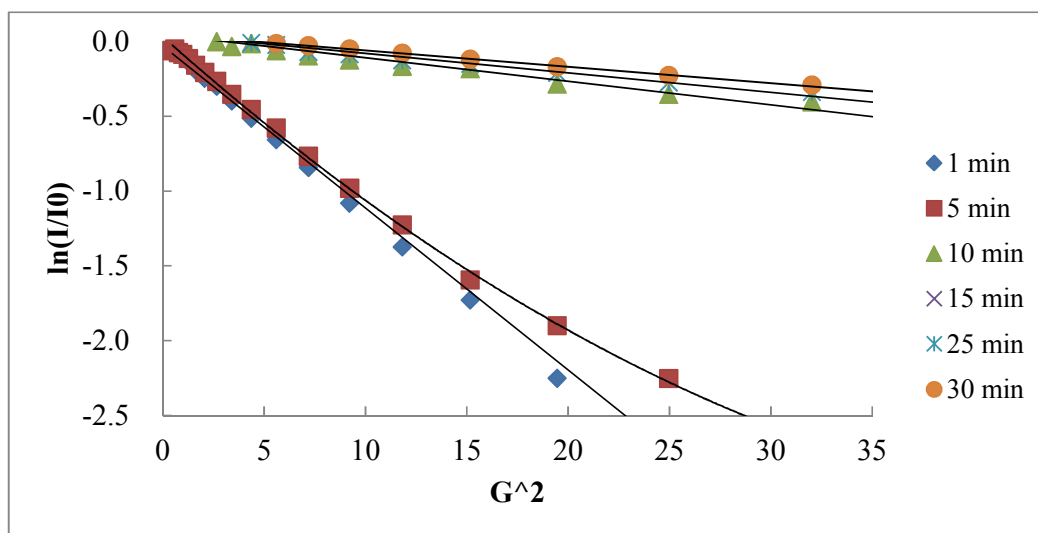

Figure S32. Stejskal – Tanner Plot of diffusion results from ROMP.

Table S1. D-Fw results of PS calibration curve and predictions.

| Samples | Mw (GPC)<br>g/mol | ave.D<br>( $10^{-11}$ ) | D ( $\delta$ 1.95)<br>( $10^{-11}$ ) | D ( $\delta$ 1.48)<br>( $10^{-11}$ ) | STDEV | % error |
|---------|-------------------|-------------------------|--------------------------------------|--------------------------------------|-------|---------|
| PS      | 9000              | 15.02                   | 15.00                                | 15.05                                | 0.03  | 0.2     |
| PS      | 30000             | 8.08                    | 8.078                                | 8.087                                | 0.006 | 0.08    |
| PS      | 60000             | 5.40                    | 5.38                                 | 5.41                                 | 0.02  | 0.4     |
| PS      | 80000             | 4.69                    | 4.67                                 | 4.70                                 | 0.02  | 0.5     |
| PS      | 156000            | 3.31                    | 3.28                                 | 3.33                                 | 0.03  | 1.0     |
| PS      | 200000            | 3.00                    | 2.97                                 | 3.02                                 | 0.03  | 1.0     |

  

| Samples | Mw ( $\delta$ 1.95)<br>g/mol | Mw ( $\delta$ 1.48)<br>g/mol | STDEV | % error |
|---------|------------------------------|------------------------------|-------|---------|
| PS      | 9145                         | 9094                         | 36    | 0.4     |
| PS      | 28964                        | 28905                        | 42    | 0.1     |
| PS      | 61733                        | 61055                        | 479   | 0.8     |

|    |        |        |      |     |
|----|--------|--------|------|-----|
| PS | 80317  | 79271  | 740  | 0.9 |
| PS | 154958 | 150993 | 2803 | 1.8 |
| PS | 185817 | 181033 | 3383 | 1.8 |

Table S2. ATRP results from GPC and externally referenced DOSY.

| t/min | Mw GPC<br>g/mol | ave.D<br>(10 <sup>-10</sup> ) | D ( $\delta$ 1.95)<br>(10 <sup>-10</sup> ) | D ( $\delta$ 1.48)<br>(10 <sup>-10</sup> ) | STDEV | % error |
|-------|-----------------|-------------------------------|--------------------------------------------|--------------------------------------------|-------|---------|
| 0     | -               | 17.6                          | 17.3                                       | 18.0                                       | 0.5   | 3       |
| 5     | -               | 9.17                          | 9.16                                       | 9.19                                       | 0.02  | 0.3     |
| 20    | -               | 7.00                          | 6.96                                       | 7.10                                       | 0.09  | 1.4     |
| 50    | -               | 4.97                          | 4.94                                       | 4.99                                       | 0.03  | 0.6     |
| 120   | 3100            | 3.00                          | 2.99                                       | 3.02                                       | 0.02  | 0.7     |
| 240   | 5500            | 1.93                          | 1.92                                       | 1.95                                       | 0.03  | 1.4     |
| 480   | 9400            | 1.45                          | 1.43                                       | 1.47                                       | 0.03  | 2.1     |
| 1200  | 17300           | 1.07                          | 1.05                                       | 1.09                                       | 0.03  | 2.7     |
| 2700  | 26900           | 0.849                         | 0.847-                                     | 0.850                                      | 0.002 | 0.3     |

| t/min | Mw ( $\delta$ 1.95)<br>g/mol | Mw ( $\delta$ 1.48)<br>g/mol | STDEV | % error |
|-------|------------------------------|------------------------------|-------|---------|
| 0     | 100                          | 93                           | 5     | 5.0     |
| 5     | 326                          | 324                          | 2     | 0.5     |
| 20    | 542                          | 523                          | 14    | 2.6     |
| 50    | 1024                         | 1007                         | 12    | 1.2     |
| 120   | 2603                         | 2559                         | 32    | 1.2     |
| 240   | 5964                         | 5756                         | 147   | 2.5     |

|      |       |       |     |     |
|------|-------|-------|-----|-----|
| 480  | 10301 | 9760  | 382 | 3.8 |
| 1200 | 18343 | 17108 | 873 | 4.9 |
| 2700 | 27147 | 26946 | 142 | 0.5 |

| time/min | Mn<br>g/mol | Mp<br>g/mol | Mz<br>g/mol | Mw<br>g/mol | PDI<br>g/mol |
|----------|-------------|-------------|-------------|-------------|--------------|
| 120      | 3000        | 3100        | 3300        | 3100        | 1.03         |
| 240      | 5400        | 5500        | 5600        | 5500        | 1.02         |
| 480      | 9300        | 9200        | 9600        | 9400        | 1.01         |
| 1200     | 16900       | 16800       | 17900       | 17300       | 1.02         |
| 2700     | 25600       | 27600       | 28500       | 26900       | 1.03         |

Table S3. RAFT results from GPC and externally referenced DOSY.

| t/min | Mw GPC<br>g/mol | ave.D<br>(10 <sup>-10</sup> ) | D (δ 1.95)<br>(10 <sup>-10</sup> ) | D (δ 1.48)<br>(10 <sup>-10</sup> ) | STDEV | % error |
|-------|-----------------|-------------------------------|------------------------------------|------------------------------------|-------|---------|
| 230   | 2900            | 2.60                          | 2.57                               | 2.65                               | 0.06  | 2.2     |
| 590   | 6200            | 1.80                          | 1.83                               | 1.81                               | 0.04  | 1.9     |
| 1345  | 9700            | 1.41                          | 1.40                               | 1.43                               | 0.02  | 1.5     |
| 1760  | 10600           | 1.36                          | 1.35                               | 1.38                               | 0.03  | 1.9     |

  

| t/min | Mw (δ 1.95)<br>g/mol | Mw (δ 1.48)<br>g/mol | STDEV | % error |
|-------|----------------------|----------------------|-------|---------|
| 230   | 3390                 | 3201                 | 133   | 4.0     |
| 590   | 6697                 | 6361                 | 238   | 3.6     |
| 1345  | 10451                | 10048                | 285   | 2.8     |

| 1760    | 11321       | 10763       | 395         | 3.6         |      |
|---------|-------------|-------------|-------------|-------------|------|
| t/min   | Mn<br>g/mol | Mp<br>g/mol | Mz<br>g/mol | Mw<br>g/mol | PDI  |
| 230.00  | 2800.00     | 2900.00     | 3100.00     | 2900.00     | 1.04 |
| 590.00  | 5900.00     | 6300.00     | 6400.00     | 6200.00     | 1.04 |
| 1345.00 | 9200.00     | 9700.00     | 10300.00    | 9700.00     | 1.06 |
| 1760.00 | 10200.00    | 10700.00    | 11400.00    | 10600.00    | 1.06 |

Table S4. D-Fw results of PS calibration curve and predictions with enhanced PS calibration for Mw prediction between 9000-30000 g/mol.

| Samples | Mw (GPC)<br>g/mol | ave. D<br>( $10^{-10}$ ) | ave. Mw (DOSY)<br>g/mol | Diff % |
|---------|-------------------|--------------------------|-------------------------|--------|
| PS      | 9000              | 15.02                    | 9100                    | -1.3   |
| PS      | 30000             | 8.082                    | 28900                   | 3.6    |
| PS      | 60000             | 5.397                    | 61300                   | -2.3   |
| PS      | 80000             | 4.688                    | 80000                   | 0.2    |
| PS      | 156000            | 3.305                    | 153000                  | 1.9    |
| PS      | 200000            | 2.998                    | 183000                  | 8.2    |
| BEN     | 78                | 200.0                    | 73                      | 5.9    |
| PS ATRP | 5500              | 1.934                    | 5700                    | -4.6   |
| PS ATRP | 9400              | 1.447                    | 9800                    | -5.1   |
| PS ATRP | 17300             | 1.066                    | 17400                   | -0.9   |
| PS ATRP | 26900             | 0.8489                   | 26700                   | 0.8    |

Table S5. D-Fw results of PS calibration curve for Mw prediction of polycyclooctene samples.

| Samples | Mw (GPC)<br>g/mol | ave. D<br>( $10^{-10}$ ) | ave. Mw (DOSY)<br>g/mol | Diff % |
|---------|-------------------|--------------------------|-------------------------|--------|
| PS      | 9000              | 15.02                    | 9400                    | -4.1   |
| PS      | 30000             | 8.082                    | 29600                   | 1.3    |
| PS      | 60000             | 5.397                    | 62700                   | -4.5   |
| PS      | 80000             | 4.688                    | 81500                   | -1.8   |
| PS      | 156000            | 3.305                    | 15600                   | 0.02   |
| PS      | 200000            | 2.998                    | 187000                  | 6.5    |
| BEN     | 78                | 200.0                    | 76                      | 2.1    |
| PolyCOE | 71800             | 5.130                    | 68900                   | 3.9    |
| PolyCOE | 9800              | 14.47                    | 9700                    | 1.2    |

Table S6. D-Fw results of PS calibration curve with incorporated polycyclooctene samples for ROMP measurements.

| Samples | Mw (GPC)<br>g/mol | ave. D<br>( $10^{-10}$ ) | ave. Mw (DOSY)<br>g/mol | Diff % |
|---------|-------------------|--------------------------|-------------------------|--------|
| PS      | 9000              | 15.02                    | 9700                    | -7.8   |
| PS      | 30000             | 8.082                    | 30800                   | -2.5   |
| PS      | 60000             | 5.397                    | 65300                   | -8.7   |
| PS      | 80000             | 4.688                    | 84800                   | -6.0   |
| PS      | 156000            | 3.305                    | 163000                  | -4.2   |
| PS      | 200000            | 2.998                    | 195000                  | 2.4    |
| BEN     | 78                | 200.0                    | 78                      | -0.2   |
| PolyCOE | 71800             | 5.130                    | 69500                   | 3.1    |
| PolyCOE | 9800              | 14.47                    | 9800                    | 0.4    |

Table S7. D-Fw results of 1,5-Cyclooctadiene ROMP reaction mixtures in DCM.

| t/min | ave.D<br>( $10^{-10}$ ) | D ( $\delta$ 1.48)<br>( $10^{-10}$ ) | D ( $\delta$ 1.95)<br>( $10^{-10}$ ) | STDEV | % error |
|-------|-------------------------|--------------------------------------|--------------------------------------|-------|---------|
| 1     | 16.8                    | 16.7                                 | 16.9                                 | 0.2   | 1.0     |
| 5     | 14.8                    | 14.5                                 | 15.0                                 | 0.02  | 2.1     |
| 10    | 1.29                    | 1.27                                 | 1.29                                 | 0.09  | 1.3     |
| 15    | 1.07                    | 1.05                                 | 1.09                                 | 0.03  | 2.2     |
| 25    | 0.880                   | 0.876                                | 0.883                                | 0.02  | 0.6     |
| 30    | 0.843                   | 0.840                                | 0.844                                | 0.03  | 0.3     |
| 45    | 0.819                   | 0.816                                | 0.823                                | 0.03  | 0.6     |
| 60    | 0.815                   | 0.807                                | 0.821                                | 0.03  | 1.2     |

| t/min | Mw ( $\delta$ 1.48)<br>g/mol | Mw ( $\delta$ 1.95)<br>g/mol | STDEV | % error |
|-------|------------------------------|------------------------------|-------|---------|
| 1     | 109                          | 106                          | 2     | 1.8     |
| 5     | 140                          | 133                          | 5     | 3.9     |
| 10    | 13029                        | 12583                        | 315   | 2.5     |
| 15    | 18365                        | 17313                        | 743   | 4.2     |
| 25    | 25968                        | 25586                        | 270   | 1.0     |
| 30    | 28026                        | 27798                        | 161   | 0.6     |
| 45    | 29583                        | 29117                        | 329   | 1.1     |
| 60    | 30220                        | 29269                        | 672   | 2.3     |

Table S8. D-Fw results of cyclooctene ROMP reaction mixtures with 2<sup>nd</sup> generation Grubbs catalyst in DCM.

| t/min | ave. D<br>(10 <sup>-10</sup> ) | ave. Mw (DOSY)<br>g/mol |
|-------|--------------------------------|-------------------------|
| 1     | 15.50                          | 124                     |
| 5     | 13.40                          | 162                     |
| 10    | 9.70                           | 297                     |
| 15    | 6.05                           | 714                     |
| 20    | 3.42                           | 2065                    |
| 25    | 0.916                          | 23884                   |
| 30    | 0.565                          | 58582                   |
| 45    | 0.522                          | 67887                   |
| 60    | 0.463                          | 84939                   |

Table S9. D-Fw results of cyclooctene ROMP reaction mixtures with 3<sup>rd</sup> generation Grubbs catalys in DCM.

| t/min | ave. D<br>(10 <sup>-10</sup> ) | ave. Mw (DOSY)<br>g/mol |
|-------|--------------------------------|-------------------------|
| 1     | 1.800                          | 6804                    |
| 5     | 0.8297                         | 28701                   |
| 10    | 0.6290                         | 48021                   |
| 15    | 0.6150                         | 50073                   |
| 20    | 0.5980                         | 52751                   |
| 25    | 0.5894                         | 54190                   |
| 30    | 0.5844                         | 55055                   |
| 45    | 0.5753                         | 56685                   |
| 60    | 0.5751                         | 56721                   |



Table S10. D-Fw results of cyclooctene ROMP reaction mixtures with 2<sup>nd</sup> generation Grubbs catalyst in THF

| t/min | ave. D<br>(10 <sup>-10</sup> ) | ave. Mw (DOSY)<br>g/mol |
|-------|--------------------------------|-------------------------|
| 1     | 7.816                          | 440                     |
| 5     | 6.225                          | 673                     |
| 10    | 4.805                          | 1088                    |
| 15    | 3.969                          | 1552                    |
| 20    | 3.544                          | 1916                    |
| 25    | 2.424                          | 3880                    |
| 30    | 2.187                          | 4697                    |
| 45    | 2.045                          | 5322                    |
| 60    | 1.013                          | 19628                   |

- (1) Li, D.; Keresztes, I.; Hopson, R.; Williard, P. G. *Acc. Chem. Res.* **2009**, *42*, 270-280.
- (2) Delsuc, M. A.; Malliavin, T. E. *Anal. Chem.* **1998**, *70*, 2146-2148.
